# Supplementary material for: The Impact of Mavacamten on the Pathophysiology of Hypertrophic Cardiomyopathy: A Narrative Review
Source: Springer Nature journal article supplement (doi:10.1007/s40256-022-00532-x), 2022-04-18
Supplement: MOESM1 [file 24108716]

# **The Impact of Mavacamten on the Pathophysiology of Hypertrophic Cardiomyopathy: A Narrative Review**

Jay M. Edelberg<sup>1</sup> · Amy J. Sehnert<sup>1</sup> · Matthew E. Mealiffe<sup>2</sup> · Carlos L. del Rio<sup>1</sup> · Robert McDowell<sup>3</sup>

<sup>1</sup>Clinical Development, Cardiovascular Global Drug Development, MyoKardia, Inc., a wholly owned subsidiary of Bristol Myers Squibb, Brisbane, CA, USA; <sup>2</sup>Early Clinical Development, MyoKardia, Inc., a wholly owned subsidiary of Bristol Myers Squibb, Brisbane, CA, USA; <sup>3</sup>Research & Early Development, MyoKardia, Inc., a wholly owned subsidiary of Bristol Myers Squibb, Brisbane, CA, USA

**Running title:** Mavacamten and the Pathophysiology of HCM

**Journal:** *American Journal of Cardiovascular Drugs*

Corresponding author: Robert McDowell

Address: 1000 Sierra Point Parkway, Brisbane, CA, 94005

Tel: (650) 741-0904; e-mail: robert.mcdowell@bms.com

# Appendix

Supplementary Figure S1 The mechanism of action of mavacamten

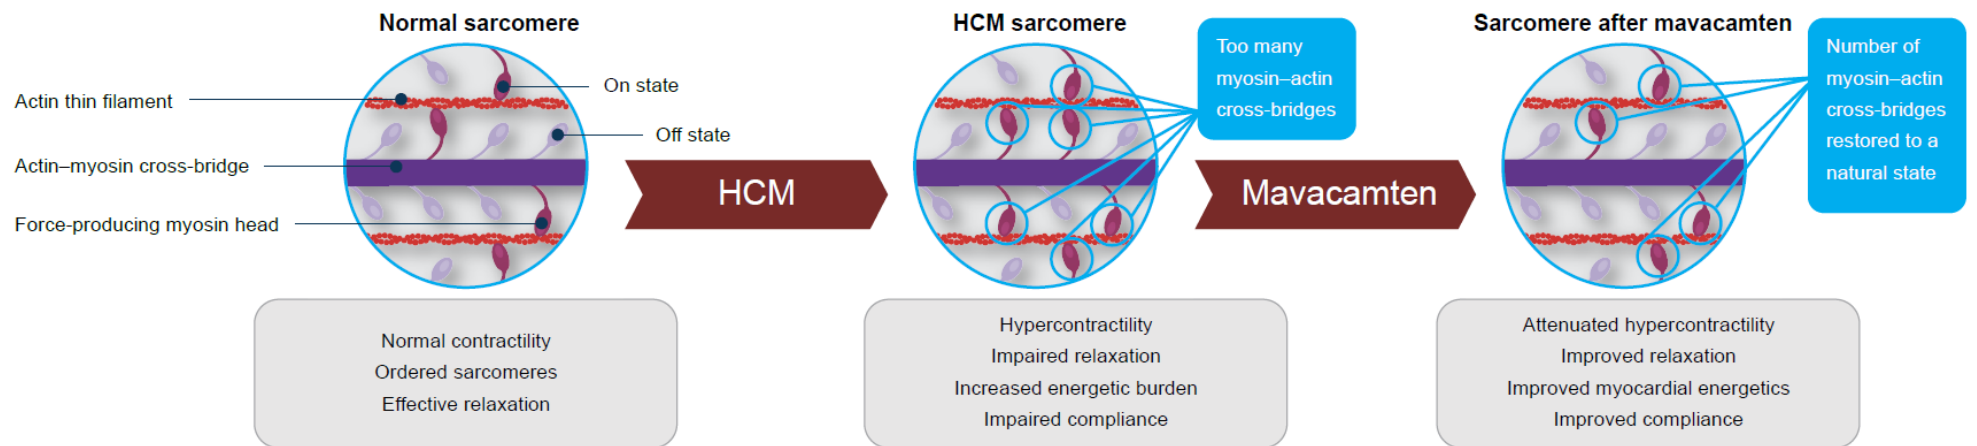

**Supplementary Table S1** Mavacamten dosage regimen and titration criteria in the PIONEER-HCM, PIONEER-OLE, MAVERICK-HCM, EXPLORER-HCM, and MAVA-LTE studies

| Study                      | Dosage                                                                                                                                                               | Titration criteria                                                                                                                                                                                                       | Temporary discontinuation criteria                                          |
|----------------------------|----------------------------------------------------------------------------------------------------------------------------------------------------------------------|--------------------------------------------------------------------------------------------------------------------------------------------------------------------------------------------------------------------------|-----------------------------------------------------------------------------|
| PIONEER-HCM (NCT02842242)  | <u>Cohort A</u> : 10–20 mg/day; starting dosage, 10 mg/day or 15 mg/day ( <i>n</i> = 11)<br><u>Cohort B</u> : 2–5 mg/day; starting dosage, 2 mg/day ( <i>n</i> = 10) | <u>Cohort A</u> : change in LVEF<br><u>Cohort B</u> : change in LVOT gradient                                                                                                                                            | NA                                                                          |
| PIONEER-OLE (NCT03496168)  | Starting dosage: 5 mg/day                                                                                                                                            | Target plasma concentration: 250–500 ng/mL                                                                                                                                                                               | LVEF < 45%, mavacamten plasma concentration > 1000 ng/mL, or increased QTcF |
| MAVERICK-HCM (NCT03442764) | Starting dosage: 5 mg/day                                                                                                                                            | <u>Group 1</u> : target plasma concentration ~200 ng/mL ( <i>n</i> = 19)<br><u>Group 2</u> : target plasma concentration ~500 ng/mL ( <i>n</i> = 21)                                                                     | NA                                                                          |
| EXPLORER-HCM (NCT03470545) | Starting dosage: 5 mg/day                                                                                                                                            | LVOT < 30 mm Hg and plasma concentration with a target plasma concentration 350–700 ng/mL                                                                                                                                | LVEF < 50%, mavacamten plasma concentration > 1000 ng/mL, or increased QTcF |
| MAVA-LTE (NCT03723655)     | <u>EXPLORER-LTE cohort</u> : 5 mg/day<br><u>MAVERICK-LTE cohort</u> : same dosage as parent study or 5 mg/day if in the placebo group                                | EXPLORER-LTE: clinically guided with site-read echo—Valsalva LVOT gradient and LVEF<br>MAVERICK-LTE: same as MAVERICK-HCM using plasma concentration; previously placebo-treated patients randomized into groups 1 and 2 | LVEF < 50%, mavacamten plasma concentration > 1000 ng/mL, or increased QTcF |

*HCM* hypertrophic cardiomyopathy, *LTE* long-term extension, *LVEF* left ventricular ejection fraction, *LVOT* left ventricular outflow tract, *NA* not applicable, *OLE* open-label extension  
*QTcF* QT interval with Fridericia correction

**Supplementary Table S2** Change in key endpoints from baseline to end of treatment in the PIONEER-HCM, PIONEER-OLE, MAVERICK-HCM, EXPLORER-HCM, EXPLORER-HCM CMR, and MAVA-LTE studies

|                                                      | PIONEER-HCM                                                                             | PIONEER-OLE <sup>a</sup>          | MAVERICK-HCM                                                                                                       | EXPLORER-HCM                 | EXPLORER-HCM CMR                     | MAVA-LTE (at week 48) <sup>b</sup> |                                                                                                                                                                                                                        |
|------------------------------------------------------|-----------------------------------------------------------------------------------------|-----------------------------------|--------------------------------------------------------------------------------------------------------------------|------------------------------|--------------------------------------|------------------------------------|------------------------------------------------------------------------------------------------------------------------------------------------------------------------------------------------------------------------|
|                                                      | Mavacamten<br>Cohort A: <i>n</i> = 11<br>Cohort B: <i>n</i> = 10                        | Mavacamten<br>N = 13              | Mavacamten<br>Group 1: <i>n</i> = 19 <sup>c</sup><br>Group 2: <i>n</i> = 21 <sup>c</sup><br>Placebo: <i>n</i> = 19 | Mavacamten<br><i>n</i> = 123 | Placebo<br><i>n</i> = 128            | Mavacamten<br><i>n</i> = 17        | Mavacamten<br>EXPLORER cohort <i>n</i> = 49<br>MAVERICK cohort <i>n</i> = 36                                                                                                                                           |
| <b>Mean change from baseline to end of treatment</b> |                                                                                         |                                   |                                                                                                                    |                              |                                      |                                    |                                                                                                                                                                                                                        |
| LVEF, %                                              | Cohort A: -14.6 ± 11.8<br>Cohort B: -5.5 ± 6.0                                          | -1.6 ± 4.2<br>( <i>p</i> = 0.413) | Group 1: -2.3 ± 5.3<br>Group 2: -5.6 ± 9.6<br>Placebo: -2.3 ± 4.9                                                  | -3.9 ± 7.7                   | -0.01 ± 6.8                          | -6.6 ± 6.3                         | EXPLORER cohort:<br>-8.6 ± 9.6<br>MAVERICK cohort:<br>-5.4 ± 6.0                                                                                                                                                       |
| Resting LVOT gradient, mm Hg                         | Cohort A: -47.8<br>(95% CI -72.2, -23.4)<br>Cohort B: -48.5<br>(95% CI -82.8, -14.1)    | -58.1 ± 46.7                      | NA                                                                                                                 | -38.6 ± 29.5                 | -5.5 ± 27.9<br>(95% CI -10.5, -0.5)  | NA                                 | EXPLORER cohort:<br>-27.4 ± 32.1                                                                                                                                                                                       |
| Valsalva maneuver LVOT gradient, mm Hg               | Cohort A: -84.7<br>(95% CI -113.8, -55.7)<br>Cohort B: -47.1<br>(95% CI -82.1, -12.1)   | -72.5 ± 39.7                      | NA                                                                                                                 | -49.1 ± 34.4                 | -12.1 ± 31.0<br>(95% CI -17.6, -6.6) | NA                                 | EXPLORER cohort:<br>-38.8 ± 36.7                                                                                                                                                                                       |
| Postexercise LVOT gradient, mm Hg                    | Cohort A:<br>-89.5<br>(95% CI -138.3, -40.7)<br>Cohort B: -25.0<br>(95% CI -47.1, -3.0) | -86.9 ± 53.0                      | NA                                                                                                                 | -47.2 ± 40.3                 | -10.4 ± 29.6<br>(95% CI -15.7, -5.1) | NA                                 | NA                                                                                                                                                                                                                     |
| Maximum LV wall thickness, mm                        | NA                                                                                      | -1.4 ± 2.3<br>( <i>p</i> = 0.042) | NA                                                                                                                 | NA                           | NA                                   | -2.4 ± 2.5<br>( <i>p</i> < 0.05)   | NA                                                                                                                                                                                                                     |
| E/e' average ratio                                   | NA                                                                                      | NA                                | Group 1: -1.5 ± 2.4<br>Group 2: -3.5 ± 6.8<br>Placebo: -1.6 ± 6.4                                                  | -5.1 ± 5.4                   | -1.8 ± 4.3                           | NA                                 | EXPLORER cohort:<br>-3.1 ± 4.2<br>MAVERICK cohort:<br>Group 1: -1.6 ± 3.0 <sup>c</sup><br>Group 2: -3.1 ± 3.0 <sup>c</sup><br>High-risk group: -2.4 ± 3.1 <sup>d</sup><br>Non-high-risk group: -2.5 ± 3.0 <sup>d</sup> |

|                                    |                                                                               |                                     |                                                                                          |                                   |                                     |                         |                                                                                              |
|------------------------------------|-------------------------------------------------------------------------------|-------------------------------------|------------------------------------------------------------------------------------------|-----------------------------------|-------------------------------------|-------------------------|----------------------------------------------------------------------------------------------|
| VE/CO <sub>2</sub> slope           | Cohort A: -2.2<br>(95% CI -6.1, 1.7)<br>Cohort B: -2.5<br>(95% CI -4.3, -0.7) | NA                                  | NA                                                                                       | -2.4 ± 4.6                        | 0.4 ± 4.1                           | NA                      | NA                                                                                           |
| LA volume index, mL/m <sup>2</sup> | NA                                                                            | -12.5 ± 12.9                        | Group 1: 0.3 ± 7.2<br>Group 2: 2.4 ± 9.1<br>Placebo: -0.8 ± 8.7                          | -7.5 ± 7.8<br>(95% CI -9.0, -6.1) | -0.1 ± 8.7<br>(95% CI, -1.6 to 1.5) | NA                      | EXPLORER cohort:<br>-9.1 ± 9.8<br>MAVERICK cohort:<br>-4.3 ± 7.2                             |
| NT-proBNP, pg/mL                   | -425<br>(-748 to -68) <sup>e</sup>                                            | -465<br>(-3952 to -99) <sup>e</sup> | Group 1: -47.1 <sup>f</sup><br>Group 2: -57.9 <sup>f</sup><br>Placebo: -0.7 <sup>f</sup> | 0.2 (266.91) <sup>g,h</sup>       | 1.0 (55.80) <sup>g</sup>            | 0.2 (81.4) <sup>g</sup> | EXPLORER cohort:<br>0.3 (128.8) <sup>g</sup><br>MAVERICK cohort:<br>0.4 (118.4) <sup>f</sup> |
| cTnl, ng/mL                        | NA                                                                            | NA                                  | Group 1: -23.4 <sup>f</sup><br>Group 2: -41.0 <sup>f</sup><br>Placebo: 3.8 <sup>f</sup>  | 0.6 (49.17) <sup>g,i</sup>        | 1.0 (143.34) <sup>g</sup>           | 0.5 (53.3) <sup>g</sup> | NA                                                                                           |
| Global ECVF, %                     | NA                                                                            | NA                                  | NA                                                                                       | NA                                | NA                                  | 0.02 ± 0.07             | NA                                                                                           |

Data are mean ± SD unless otherwise stated

*CI* confidence interval, *CMR* cardiac magnetic resonance, *cTnl* cardiac troponin I, *CV* coefficient of variability, *E/e'* ratio between early mitral inflow velocity and early diastolic mitral annular velocity, *ECVF* extracellular volume fraction, *HCM* hypertrophic cardiomyopathy, *IQR* interquartile range, *LA* left atrial, *LTE* long-term extension, *LV* left ventricular, *LVEF* left ventricular ejection fraction, *LVOT* left ventricular outflow tract, *NA* not applicable, *NT-proBNP* N-terminal pro B-type natriuretic peptide, *OLE* open-label extension, *SD* standard deviation, *VE/VCO<sub>2</sub>* minute ventilation to carbon dioxide production

<sup>a</sup>The cut-off date for the interim analysis of PIONEER-OLE was June 4, 2020; the data presented are change from baseline to week 72. <sup>b</sup>The cut-off date for the interim analysis of MAVA-LTE was October 30, 2020. <sup>c</sup>Group 1: mavacamten doses titrated to target a serum drug concentration of ~200 ng/mL. Group 2: mavacamten doses titrated to target a serum drug concentration of ~500 ng/mL. <sup>d</sup>High-risk group was defined as the presence of cTNI > 0.03 and/or E/e' average > 14 at baseline in parent study. <sup>e</sup>Median (IQR). <sup>f</sup>Percentage change in geometric mean (%). <sup>g</sup>Geometric mean ratio to baseline (geometric mean [%CV]). <sup>h</sup>This corresponds to an 80% reduction compared with placebo. <sup>i</sup>This corresponds to a 40% reduction compared with placebo
